# Supplementary material for: Novel Alleles of Two Tightly Linked Genes Encoding Polygalacturonase-Inhibiting Proteins (VrPGIP1 and VrPGIP2) Associated with the Br Locus That Confer Bruchid (Callosobruchus spp.) Resistance to Mungbean (Vigna radiata) Accession V2709
Source: Front Plant Sci. 2017 Sep 28;8:1692. doi: 10.3389/fpls.2017.01692 (PMC5625325; doi:10.3389/fpls.2017.01692)
Supplement: Supplementary file 1 [file Table1.xlsx]

## Sheet: Sheet1
Supplementary Table S1. DNA markers used to screen for polymorphism between mungbean accessions Kamphaeng Saen 1 and V2709.
Primer names	Type	SSR motif(s)	Forward sequence	Reverse sequence	Annealing (°C)	Polymorphism	Reference
VrBr047	STS	-	TGATCTGTTTGGTGATCGAAA	GGATCCATGTGGCAACCA	55	Monomorphic	This study
VrB048	STS	-	TCGATCTTGATGAGCTTCTCC	TGTGGACACAAATTACATAAAAATGA	55	Monomorphic	This study
VrB049	STS	-	AGCAAGAAGGAGAATGAACAGTG	CGCTTGTGGGAGATCCTAAC	55	Monomorphic	This study
VrBr-SSR053	SSR	(AT)24	CTCGTCCAATCAATTCTTAAA	CGAAATCGAATTTAATGAGG	50	Multiple DNA bands	This study
VrBr-SSR146	SSR	(AT)24	TTGAAAATAAAATGTGTAAACCAAGG	AAATTTCCGTCAAAATTGAACA	55	Monomorphic	This study
VrBr-SSR147	SSR	(AT)11..(TA)8	TTTAATTTATCCTCCCGAGTAA	CAATAACAACAATGCTCTCG	50	Monomorphic	This study
VrBr-SSR148	SSR	(AT)12	AAAAGGCCATAAAATTACATATAG	AAAATGGTCTTAAGTAACATGACA	55	Monomorphic	This study
VrBr-SSR149	SSR	(AT)28	TTGAGAAAAGAACAACTGAAAA	AACTTTAATTCCACACTTAGTGAA	50	No amplification	This study
VrBr-SSR150	SSR	(TA)21	CATGAATTTTCTAGAGGTTATTTGGA	TTCAACCCGTAACAATTTTCAA	55	Monomorphic	This study
VrBr-SSR151	SSR	(TA)30	GGTTATTAACTAATTGCTAACTCTGT	AACAAATTGCCCAATAAAAA	50	Monomorphic	This study
VrBr-SSR152	SSR	(AGA)5	AGGAGTTGAAGGTTAAAACAATAGAAA	TTGGAAACCTTCCCTTTTAGG	55	Monomorphic	This study
VRID1	Indel	-	TCGGTTTCAGCTCGATAGATTC	GATGTTGTCTGAAGTAGTGGTA	55	Polymorphic	This study
VRID2	Indel	-	AAGAAAAATGAATTGCAAGATGA	GGCTTCACAGCCAAAATCTC	55	No amplification	This study
VRID3	Indel	-	TCCATGGTAGACTTTGTCACT	TTATGGCAGTAAAACACAACA	50	Monomorphic	This study
VRID4	Indel	-	TTATGGCAGTAAAACACAACA	TCCATGGTAGACTTTGTCACT	50	Monomorphic	This study
VRID5	Indel	-	AGAATAAAATGAATCTAGAAGACCA	TGAATTAATTTTCTTACCCTTGT	50	Polymorphic	This study
VRID6	Indel	-	GCCAACCAGCGGTATTGTAT	GGTTGAGCCATTGCTTGTTT	55	Monomorphic	This study
VRID7	Indel	-	AGGATGCTTCCAAACACACC	TGAAAATTGTTACGGGTTGAAA	55	No amplification	This study
VRID9	Indel	-	TTCAAACCGAAAAATCAAAT	CTTCTTCTCGTATGGCTTTG	50	Polymorphic	This study
VRID3810	STS	-	TCCCTTCACATCTTCCATTCGCT	CTGAGCAGCCATCAGTATCACC	55	Polymorphic	This study
VrBr_Indel	Indel	-	AGTTGAAGGGCCAAATACCA	GATGGAGGGCGGAAGTAGA	55	Monomorphic	This study
VrBURP1ID	Indel	-	CAATTCAGTTTAAAATTAGTATAGTTGG	ACTGTACTGCACTGCAAAAA	55	Multiple DNA bands	This study
g39185	STS	-	ACTGTACTGCACTGCAAAAA	CAATTCAGTTTAAAATTAGTATAGTTGG	55	No amplification	This study
VrBrID1	Indel	-	CCGTTCTCAAATAGAGATGGGTA	GATGTTGTCTGAAGTAGTGGTA	55	No amplification	This study
VrBrID2	Indel	-	CCGTTCTCAAATAGAGATGGGTA	GTAGCTTGTGGTCGTTCGTG	55	No amplification	This study
VrBr-SSR001	SSR	(AT)14	TGTGCATATTAATTTGGGATTCA	TGGGTTTCACCCTACCACTT	50	Monomorphic	Chotechung et al. (2016)
VrBr-SSR002	SSR	(TA)43	CTTTAACTTGTGGGAACTGAA	AAATTACTCCTAAATGGAAATGTT	55	Polymorphic	Chotechung et al. (2016)
VrBr-SSR003	SSR	(AT)28	GCAATAAATTGAGAAAAGAACAACTG	AAAAACTTTAATTCCACACTTAGTGAA	55	No amplification	Chotechung et al. (2016)
VrBr-SSR004	SSR	(AT)33	TTGAGAGGAATGACAAAGGTGA	TGGACCTGTGTATACAAAAATTGAA	55	Polymorphic	Chotechung et al. (2016)
VrBr-SSR005	SSR	(AT)24...(TA)28	TCCAGCATGAAATGCAAAAA	AAACGTACCAACTGAAAACAGG	55	Polymorphic	Chotechung et al. (2016)
VrBr-SSR006	SSR	(AT)27	GCAGGGCTCTCTCATCACA	CGTATGGAATAACACGACTTGC	55	Monomorphic	Chotechung et al. (2016)
VrBr-SSR007	SSR	(AT)35	TCACATTTGACATATTGTGTTGATT	TGGGTCAAGTTATTACCAAATCG	55	No amplification	Chotechung et al. (2016)
VrBr-SSR008	SSR	(TA)35	ATTCGCAATGGAGTTTGGAC	TGCACCAAAGTAGACATACGG	55	Monomorphic	Chotechung et al. (2016)
VrBr-SSR009	SSR	(AT)27	CCGCTATTGGACCACTCAAT	CCGGCTTTTAAGGTGAGG	55	Monomorphic	Chotechung et al. (2016)
VrBr-SSR010	SSR	(TA)20	GCAATTGATCTCCCAACCAT	TTTGTGGTTCTGCTCATTGC	55	Monomorphic	Chotechung et al. (2016)
VrBr-SSR011	SSR	(TAT)9	AATGAAGTGAACTGTAGGTGTAA	CGTTTTCCTTTCCATTAAGA	50	Monomorphic	Chotechung et al. (2016)
VrBr-SSR012	SSR	(TG)7	TGACTCGGGTCTACCAATCC	TAATGGGCAAATTCCCACAG	55	Monomorphic	Chotechung et al. (2016)
VrBr-SSR013	SSR	(TA)8...(AT)19	TCCAAAGGAATTAAAACACAACG	TCGCTTCTCAACTATTCACTTCTT	55	Monomorphic	Chotechung et al. (2016)
VrBr-SSR014	SSR	(GA)7	GAAACAGTGTGCGGAACAAA	TGTGTCAATTCCTTTTGAAAATACC	55	Monomorphic	Chotechung et al. (2016)
VrBr-SSR015	SSR	(AT)12	TGGGTTTTTGCAGGATTGTT	ATTCATATCGCGCTTTCGTT	55	Monomorphic	Chotechung et al. (2016)
VrBr-SSR016	SSR	(AT)7	GACGGCTAGGTACAACACTGC	TTTAGAGCAATTGGGTGGATTT	55	Monomorphic	Chotechung et al. (2016)
VrBr-SSR017	SSR	(TA)19	GACTTGGGTTCCACAAGCTAA	CGTTTGGAGCTTAGTACACACC	55	Polymorphic	Chotechung et al. (2016)
VrBr-SSR018	SSR	(AT)13	TCGTATCTCTTCTCTTCCAACTCA	CCCCAAAATATAGGGACTAAAAACA	55	Monomorphic	Chotechung et al. (2016)
VrBr-SSR019	SSR	(AT)39	ACTGAAACAGAAGCATATAGAGC	AAGCCAAAAAGTAAAATATTCAG	50	Monomorphic	Chotechung et al. (2016)
VrBr-SSR020	SSR	(AT)43	GACCTACGCATTCATCGAAAA	TTGCATTAAACAAGATGCGTTT	55	No amplification	Chotechung et al. (2016)
VrBr-SSR021	SSR	(AT)35	ATCAATGGATGGGACTTTGG	ACAATCTCCCACTGGTCACA	55	Monomorphic	Chotechung et al. (2016)
VrBr-SSR022	SSR	(TA)23	TTTCAAAAGAACTTGTGGAGCTT	TGGAAATCTCCAACCACAAA	55	Polymorphic	Chotechung et al. (2016)
VrBr-SSR023	SSR	(AT)37	AAAATGTACTGAGCAAACTTTAGGAAT	CCCTTAAACACATTTCCCACA	55	Polymorphic	Chotechung et al. (2016)
VrBr-SSR024	SSR	(TA)38	TTTTGTGGACACTCCTTCCA	AAGCGTCACACCCTCAATTC	55	Polymorphic	Chotechung et al. (2016)
VrBr-SSR025	SSR	(TA)35	CGATTTGTACATCGGAGCTG	TCTCCTTGTTGCACTTGTGG	55	Monomorphic	Chotechung et al. (2016)
VrBr-SSR026	SSR	(TA)25...(TA)37	CGCACCCTGAAATTATTGGA	TTTGCAACTGTGAAGGCAAG	55	Monomorphic	Chotechung et al. (2016)
VrBr-SSR027	SSR	(AT)25	ATCTCTCCGTATGGATTGAAAAT	TTTTTGCCATCCGTGAAATC	55	Monomorphic	Chotechung et al. (2016)
VrBr-SSR028	SSR	(AT)30	TCCATTGTTTGTGTTTAGACCAG	TCAAATCAATTTTCCACTCCTG	55	Polymorphic	Chotechung et al. (2016)
VrBr-SSR029	SSR	(AT)36	GGTTACTTTTTCCCCTTGTT	TATCCTTGGGATAAAAATTGA	50	Polymorphic	Chotechung et al. (2016)
VrBr-SSR030	SSR	(TA)28	CAGCTAGGAAACTCACCAAACC	CAGCTGGCAGGTGAAATATG	55	Polymorphic	Chotechung et al. (2016)
VrBr-SSR031	SSR	(AT)19	GGCGTACGCGTGTTAACAA	TAGCAATTACTTACCTACCACCTCT	55	Monomorphic	Chotechung et al. (2016)
VrBr-SSR032	SSR	(AT)26	GGTTATTTTGATCTAAAGGGCCA	GTGTGAGAAGATTTGGGAATGTAA	55	Polymorphic	Chotechung et al. (2016)
VrBr-SSR033	SSR	(CA)9	CTCAAGTCTTATGTTTCCCCCTAT	GCACTAAAGGACTTTCCTTGAAC	55	Polymorphic	Chotechung et al. (2016)
VrBr-SSR034	SSR	(GAA)5…(GAA)6	CCCCAACAACATACCTAACCTAC	GGTTCTTCTTCTTCTTCTTCCAA	55	Monomorphic	Chotechung et al. (2016)
VrBr-SSR035	SSR	(TCA)5	TTTCAATTTATAGGTCAAAGCCA	GGGTTTGCGTTTCTTGTAACTC	55	Monomorphic	Chotechung et al. (2016)
VrBr-SSR036	SSR	(TA)36	CGGGTGATGGTTTCCTCACTAT	CCCATTGGATCTGTAAGGGAAG	55	Monomorphic	Chotechung et al. (2016)
VrBr-SSR037	SSR	(TAA)6	CTTCTCCACTTCACCTTCTTTTG	GAAACAATCGTCAGCCTATAATCA	55	Polymorphic	Chotechung et al. (2016)
VrBr-SSR038	SSR	(TTC)5	TGATTCTCCTTCTTTCCGCTT	AAGATGTTGACGTTCAAACTTAAGA	50	Monomorphic	Chotechung et al. (2016)
VrBr-SSR039	SSR	(AAT)7…(ATT)9	AAGTTGGTGTAGCACTTGCAGA	AATGAATTAAAAGAAAACACTACTG	55	Polymorphic	Chotechung et al. (2016)
VrBr-SSR040	SSR	(AT)5	GTCCGTGATGAGGAATCTAATGT	CGAGGTCCCATAGCTGACATCT	55	Monomorphic	Chotechung et al. (2016)
VrBr-SSR041	SSR	(GGT)5	GAGCCTGTAAACTTGACCAAGAA	AAAATTGCCCCAATAAGAGTGA	55	Monomorphic	Chotechung et al. (2016)
VrBr-SSR042	SSR	(GAA)5	TGGAGGTGGTAAAAGTGACTCTAA	CATAGCTCTATGAATACTCCACCC	55	Monomorphic	Chotechung et al. (2016)
VrBr-SSR043	SSR	(TTC)8	TGGGAATCCTAACTTATGTGGG	AATCAGCGTAATCAAACCAAGG	55	Monomorphic	Chotechung et al. (2016)
VrBr-SSR044	SSR	(AT)6	TGATTTGGGGAATTTGTTTA	CAATAAGAGCAAGTGAAATTGA	50	Polymorphic	Chotechung et al. (2016)
VrBr-SSR045	SSR	(TC)5	TGGCACACTCATTCCATTAACT	GGATGATGATATTTGTCCGTTG	55	Monomorphic	Chotechung et al. (2016)
P9G1789	SSR	(TA)5	CACGGCTCTTAAGGTGATGA	TGTGGCCAATAACCAAAATG	55	Monomorphic	Chotechung et al. (2016)
GBssr-MB87	SSR	(CAA)4	TCCCTTGTGGGAGATCCT	CTTTGCCACACTCCTTGC	55	Polymorphic	Gwag et al. (2007)
RP	STS	-	ATGGAGTTTCAGTGCCTTGC	CACACAATCCAGAAATGCCTTA	50	Polymorphic but ambigious	Hong et al. (2015)
VR256	SSR	(TC)11	GCTGTGGTGTATTTACCTTGGG	ATCCTCCGGTCATTATCTTGTG	55	Polymorphic	Tangphatsornruang et al. (2009)
g34480p	STS	-	AATTCTTGATTGGTCCACAtG	AAAAAATTACACCTCGTTCG	55	No amplification	Liu et al. (2016)
g779p	STS	-	CTAATAAATCATCTATACGTCTCTC	ATTGCTATTTAGCGAATAATAGTAC	55	No amplification	Liu et al. (2016)
g34458p	STS	-	ATGGTGTCAAAAGCATTTTACCaG	TAACAACTGGAACTACCTCTCG	55	Polymorphic	Liu et al. (2016)
